# Supplementary material for: Pore Properties of the Lacustrine Shale in the Upper Part of the Sha-4 Member of the Paleogene Shahejie Formation in the Dongying Depression in East China
Source: Hindawi journal article supplement (doi:10.1155/2021/6616843), 2021-03-15
Supplement: f1 [file 6616843.f1.docx]

Table S1: Sampling information, lithology, mineral composition, insoluble organic carbon (IOC) and vitrinite reflectance (Ro) of the Dongying Es4U shale samples.

| Samples | Wells | Es4U shale  thickness in  the well (m) | Burial depth  (m) | Sampling  position  in Es4U shale | Lithology | Ro(%) | IOC  (wt%) | Mineral content (wt%) | | | | | | |
| --- | --- | --- | --- | --- | --- | --- | --- | --- | --- | --- | --- | --- | --- | --- |
| Clay | Quartz | Feldspar | Calcite | Dolomite | Siderite | Pyrite |
| DYS1 | FS1 | 322.2 | 3435.4 | Top | Shale | 0.72 | 1.50 | 43 | 20 | 12 | 19 | 6 | n.d. | n.d. |
| DYS2 | FS1 | 322.2 | 3679.4 | Middle | Shale | 0.78 | 1.58 | 30 | 21 | 23 | 22 | n.d. | n.d. | 4 |
| DYS3 | FS1 | 322.2 | 3810.9 | Bottom | Shale | 0.80 | 2.15 | 24 | 25 | 37 | 4 | 8 | n.d. | 2 |
| DYS4 | FS1 | 322.2 | 3905.9 | Bottom | Shale | 1.00 | 2.06 | 9 | 19 | 13 | 4 | 54 | n.d. | n.d. |
| DYS5 | FS1 | 322.2 | 3907.9 | Bottom | Shale | 0.97 | 1.77 | 9 | 24 | 25 | 18 | 21 | n.d. | 2 |
| DYS6 | L672 | 336.4 | 3931.3 | Top | Shale | 0.91 | 3.32 | 29 | 31 | 10 | 20 | 10 | n.d. | n.d. |
| DYS7 | L672 | 336.4 | 4148.7 | Bottom | Shale | 1.29 | 2.12 | 30 | 12 | 32 | 3 | 23 | n.d. | n.d. |
| DYS8 | L981 | 377.0 | 3598.9 | Bottom | Mudstone | 0.68 | 5.52 | 32 | 20 | 9 | 14 | 19 | n.d. | 6 |
| DYS9 | L988 | 244.5 | 3966.1 | Bottom | Shale | 0.83 | 1.64 | 49 | 28 | 15 | 4 | n.d. | n.d. | 4 |
| DYS10 | L988 | 244.5 | 4117.1 | Bottom | Shale | 1.05 | 2.18 | 26 | 30 | 30 | 6 | 8 | n.d. | n.d. |
| DYS11 | T720 | 220.0 | 3666.9 | Middle | Mudstone | 0.75 | 1.39 | 45 | 24 | 12 | 15 | 2 | 2 | n.d. |
| DYS12 | T746 | 252.5 | 3538.7 | Bottom | Shale | 0.75 | 2.89 | 53 | 21 | 14 | 4 | 3 | 5 | n.d. |
| DYS13 | T762 | 259.2 | 3501.9 | Middle | Shale | 0.71a | 2.58 | 18 | 48 | 20 | 9 | n.d. | 2 | 2 |
| DYS14 | W580 | 273.0 | 3163.6 | Bottom | Shale | 0.60 | 1.14 | 6 | 3 | 4 | 85 | 2 | n.d. | n.d. |
| DYS15 | W584 | 188.0 | 3598.0 | Bottom | Shale | 0.66 | 2.70 | 49 | 28 | 14 | 9 | n.d. | n.d. | n.d. |
| Average | | | | | | 0.83 | 2.30 | 30.13 | 23.60 | 18.00 | 15.73 | 10.40 | 0.60 | 1.33 |
| Standard deviation | | | | | | 0.19 | 1.07 | 15.36 | 9.83 | 9.48 | 20.31 | n.d. | n.d. | n.d. |

a Ro value of the sample DYS13 was calculated with the regression equation in Figure S3; n.d.: no detected (below detection limits).

Table S2: Pore parameters and fractal dimensions of the Es4U shale in the Dongying Depression.

| Samples | Sample  treatment | Pore parameters from low pressure gas adsorption | | | | |  | Fractal dimensions derived from the FHH model | | | | | | |
| --- | --- | --- | --- | --- | --- | --- | --- | --- | --- | --- | --- | --- | --- | --- |
| Vmic  (cm3/g) | Vmes  (cm3/g) | S  (m2/g) | APD  (nm) | Hysteresis  loop type | P/P0＜0.45 | | |  | P/P0＞0.45 | | |
| K1 | R | D1 |  | K2 | R | D2 |
| DYS1 | Extracted | 0.0044 | 0.0240 | 20.60 | 4.97 | H2 |  | -0.499 | 0.999 | 2.501 |  | -0.202 | 0.989 | 2.798 |
| DYS2 | Extracted | 0.0023 | 0.0125 | 7.30 | 6.95 | H2 |  | -0.586 | 0.999 | 2.414 |  | -0.275 | 0.994 | 2.725 |
| DYS3 | Extracted | 0.0034 | 0.0118 | 9.64 | 5.30 | H3 |  | -0.538 | 0.994 | 2.462 |  | -0.227 | 1.000 | 2.773 |
| DYS4 | Extracted | 0.0019 | 0.0057 | 2.76 | 8.47 | H3 |  | -0.751 | 0.990 | 2.249 |  | -0.342 | 0.999 | 2.658 |
| DYS5 | Extracted | 0.0017 | 0.0071 | 4.07 | 7.08 | H3 |  | -0.686 | 0.991 | 2.314 |  | -0.309 | 0.998 | 2.691 |
| DYS6 | Extracted | 0.0071 | 0.0288 | 18.85 | 6.45 | H3 |  | -0.529 | 0.999 | 2.471 |  | -0.283 | 1.000 | 2.717 |
| DYS7 | Extracted | 0.0017 | 0.0204 | 15.91 | 5.33 | H2 |  | -0.545 | 0.993 | 2.455 |  | -0.220 | 0.974 | 2.780 |
| DYS8 | Extracted | 0.0050 | 0.0109 | 4.37 | 10.44 | H3 |  | -0.579 | 0.998 | 2.421 |  | -0.412 | 1.000 | 2.588 |
| DYS9 | Extracted | 0.0024 | 0.0225 | 12.90 | 7.03 | H4 |  | -0.573 | 0.998 | 2.427 |  | -0.291 | 0.988 | 2.709 |
| DYS10 | Extracted | 0.0040 | 0.0256 | 19.38 | 5.42 | H2 |  | -0.570 | 0.992 | 2.430 |  | -0.217 | 0.983 | 2.783 |
| DYS11 | Extracted | 0.0056 | 0.0302 | 22.79 | 5.46 | H4 |  | -0.542 | 0.997 | 2.458 |  | -0.228 | 0.993 | 2.772 |
| DYS12 | Extracted | 0.0070 | 0.0260 | 16.32 | 6.44 | H2 |  | -0.584 | 0.994 | 2.416 |  | -0.270 | 0.999 | 2.730 |
| DYS13 | Extracted | 0.0034 | 0.0057 | 1.89 | 12.46 | H3 |  | -0.691 | 0.992 | 2.309 |  | -0.436 | 1.000 | 2.564 |
| DYS14 | Extracted | 0.0006 | 0.0028 | 1.04 | 11.60 | H3 |  | -0.558 | 0.992 | 2.442 |  | -0.458 | 0.992 | 2.542 |
| DYS15 | Extracted | 0.0065 | 0.0381 | 30.55 | 5.36 | H3 |  | -0.503 | 0.997 | 2.497 |  | -0.226 | 0.999 | 2.774 |
| Average | Extracted | 0.0038 | 0.0181 | 12.56 | 7.25 | - |  | -0.582 | 0.995 | 2.418 |  | -0.293 | 0.994 | 2.707 |
| Standard deviation | Extracted | 0.0021 | 0.0108 | 8.95 | 2.42 | - |  | 0.072 | 0.003 | 0.072 |  | 0.084 | 0.008 | 0.084 |
| DYS3 | Original | 0.0024 | 0.0046 | 2.59 | 2.59 | H3 |  | -0.680 | 0.993 | 2.320 |  | -0.302 | 0.994 | 2.698 |
| DYS10 | Original | 0.0023 | 0.0195 | 11.06 | 11.06 | H2 |  | -0.667 | 0.997 | 2.333 |  | -0.273 | 0.982 | 2.727 |
| DYS11 | Original | 0.0039 | 0.0277 | 14.1 | 14.1 | H4 |  | -0.624 | 0.999 | 2.376 |  | -0.313 | 0.994 | 2.687 |

Vmic: micropore volume (DFT model); Vmes: mesopore volume (DFT model); S: specific surface area (BET model); APD: average pore diameter (4×N2 adsorption pore volume / specific surface area).

Table S3: Standardized coefficients of descriptors of regression equations and variable importance in projection (VIP) values in the partial least squares regression (PLSR) analyses of the pore parameters with burial depth, mineral composition, insoluble organic carbon (IOC) and vitrinite reflectance (Ro) based on the Soxhlet-extracted samples from the Es4U shale.

| Descriptors | Standardized coefficients and VIP values in the PLSR analyses of different pore parameters | | | | | | | | | | | | | | | | | | | |
| --- | --- | --- | --- | --- | --- | --- | --- | --- | --- | --- | --- | --- | --- | --- | --- | --- | --- | --- | --- | --- |
|  | ln Vmic | |  | ln Vmes | |  | ln Vmic-mes | |  | ln S | |  | APD | |  | D1 | |  | D2 | |
|  | Standardized  coefficient | VIP |  | Standardized  coefficient | VIP |  | Standardized  coefficient | VIP |  | Standardized  coefficient | VIP |  | Standardized  coefficient | VIP |  | Standardized  coefficient | VIP |  | Standardized  coefficient | VIP |
| Constant | -8.452 | - |  | -5.511 | - |  | -5.558 | - |  | 2.112 | - |  | 2.996 | - |  | 33.498 | - |  | 32.370 | - |
| Clay minerals (wt%) | 0.327 | 1.46 |  | 0.535 | 1.84 |  | 0.509 | 1.81 |  | 0.516 | 1.76 |  | -0.203 | 1.37 |  | 0.322 | 1.94 |  | 0.206 | 1.34 |
| Quartz (wt%) | 0.203 | 1.15 |  | -0.068 | 0.84 |  | -0.010 | 0.84 |  | -0.119 | 0.85 |  | 0.027 | 0.18 |  | -0.118 | 0.71 |  | 0.008 | 0.05 |
| Feldspar (wt%) | -0.171 | 0.63 |  | -0.113 | 0.67 |  | -0.123 | 0.66 |  | -0.033 | 0.66 |  | -0.156 | 1.05 |  | -0.027 | 0.16 |  | 0.169 | 1.11 |
| Pyrite (wt%) | -0.164 | 0.64 |  | -0.253 | 0.77 |  | -0.235 | 0.74 |  | -0.297 | 0.90 |  | 0.134 | 0.90 |  | -0.079 | 0.48 |  | -0.131 | 0.86 |
| Carbonates (wt%) | -0.231 | 1.50 |  | -0.267 | 1.49 |  | -0.273 | 1.53 |  | -0.261 | 1.45 |  | 0.185 | 1.24 |  | -0.147 | 0.88 |  | -0.209 | 1.36 |
| Calcite (wt%) | -0.218 | 1.27 |  | -0.151 | 1.20 |  | -0.173 | 1.24 |  | -0.149 | 1.20 |  | 0.180 | 1.21 |  | 0.074 | 0.45 |  | -0.193 | 1.26 |
| Dolomite (wt%) | -0.063 | 0.55 |  | -0.191 | 0.68 |  | -0.173 | 0.66 |  | -0.179 | 0.61 |  | 0.023 | 0.15 |  | -0.319 | 1.92 |  | -0.041 | 0.27 |
| IOC (wt%) | 0.314 | 1.14 |  | 0.042 | 0.25 |  | 0.100 | 0.41 |  | -0.032 | 0.17 |  | 0.095 | 0.64 |  | 0.005 | 0.03 |  | -0.099 | 0.65 |
| ln Ro | -0.119 | 0.38 |  | 0.056 | 0.38 |  | 0.028 | 0.30 |  | 0.075 | 0.52 |  | -0.160 | 1.07 |  | -0.129 | 0.78 |  | 0.151 | 0.99 |
| Burial depth (m) | -0.041 | 0.39 |  | 0.138 | 0.74 |  | 0.110 | 0.68 |  | 0.148 | 0.84 |  | -0.189 | 1.27 |  | -0.073 | 0.44 |  | 0.177 | 1.15 |
| R | 0.91 | |  | 0.94 | |  | 0.94 | |  | 0.92 | |  | 0.76 | |  | 0.72 | |  | 0.80 | |

Vmic: micropore volume (cm3/g); Vmes: mesopore volume (cm3/g); Vmic-mes: micro-mesopore volume (cm3/g), sum of Vmic and Vmes; S: specific surface area; APD: average pore diameter (nm); D1 and D2: fractal dimensions (unit-free); VIP: variable importance in projection (dimensionless).

Table S4: Experimental and predicted pore parameters of the partial least squares regression (PLSR) fitting models based on the Soxhlet-extracted samples from the Es4U shale.

| Samples | Vmic | |  | Vmes | |  | APD | |  | D1 | |
| --- | --- | --- | --- | --- | --- | --- | --- | --- | --- | --- | --- |
| Experimental | Predicted |  | Experimental | Predicted |  | Experimental | Predicted |  | Experimental | Predicted |
| DYS1 | 0.0044 | 0.0039 |  | 0.0240 | 0.0222 |  | 4.97 | 7.42 |  | 2.501 | 2.465 |
| DYS2 | 0.0023 | 0.0022 |  | 0.0125 | 0.0114 |  | 6.95 | 7.50 |  | 2.414 | 2.434 |
| DYS3 | 0.0034 | 0.0027 |  | 0.0118 | 0.0123 |  | 5.30 | 6.12 |  | 2.462 | 2.409 |
| DYS4 | 0.0019 | 0.0017 |  | 0.0057 | 0.0057 |  | 8.47 | 7.71 |  | 2.249 | 2.294 |
| DYS5 | 0.0017 | 0.0015 |  | 0.0071 | 0.0062 |  | 7.08 | 7.37 |  | 2.314 | 2.348 |
| DYS6 | 0.0071 | 0.0045 |  | 0.0288 | 0.0180 |  | 6.45 | 7.27 |  | 2.471 | 2.407 |
| DYS7 | 0.0017 | 0.0020 |  | 0.0204 | 0.0189 |  | 5.33 | 4.55 |  | 2.455 | 2.376 |
| DYS8 | 0.0050 | 0.0052 |  | 0.0109 | 0.0093 |  | 10.44 | 9.69 |  | 2.421 | 2.407 |
| DYS9 | 0.0024 | 0.0045 |  | 0.0225 | 0.0293 |  | 7.03 | 5.91 |  | 2.427 | 2.454 |
| DYS10 | 0.0040 | 0.0031 |  | 0.0256 | 0.0191 |  | 5.42 | 5.09 |  | 2.430 | 2.396 |
| DYS11 | 0.0056 | 0.0044 |  | 0.0302 | 0.0284 |  | 5.46 | 6.66 |  | 2.458 | 2.467 |
| DYS12 | 0.0070 | 0.0071 |  | 0.0260 | 0.0394 |  | 6.44 | 6.47 |  | 2.416 | 2.483 |
| DYS13 | 0.0034 | 0.0049 |  | 0.0057 | 0.0101 |  | 12.46 | 8.03 |  | 2.309 | 2.409 |
| DYS14 | 0.0006 | 0.0008 |  | 0.0028 | 0.0033 |  | 11.60 | 12.22 |  | 2.442 | 2.433 |
| DYS15 | 0.0065 | 0.0074 |  | 0.0381 | 0.0348 |  | 5.36 | 6.78 |  | 2.497 | 2.483 |

Vmic: micropore volume (cm3/g); Vmes: mesopore volume (cm3/g); APD: average pore diameter(nm), D1: fractal dimension D1 (unit-free).


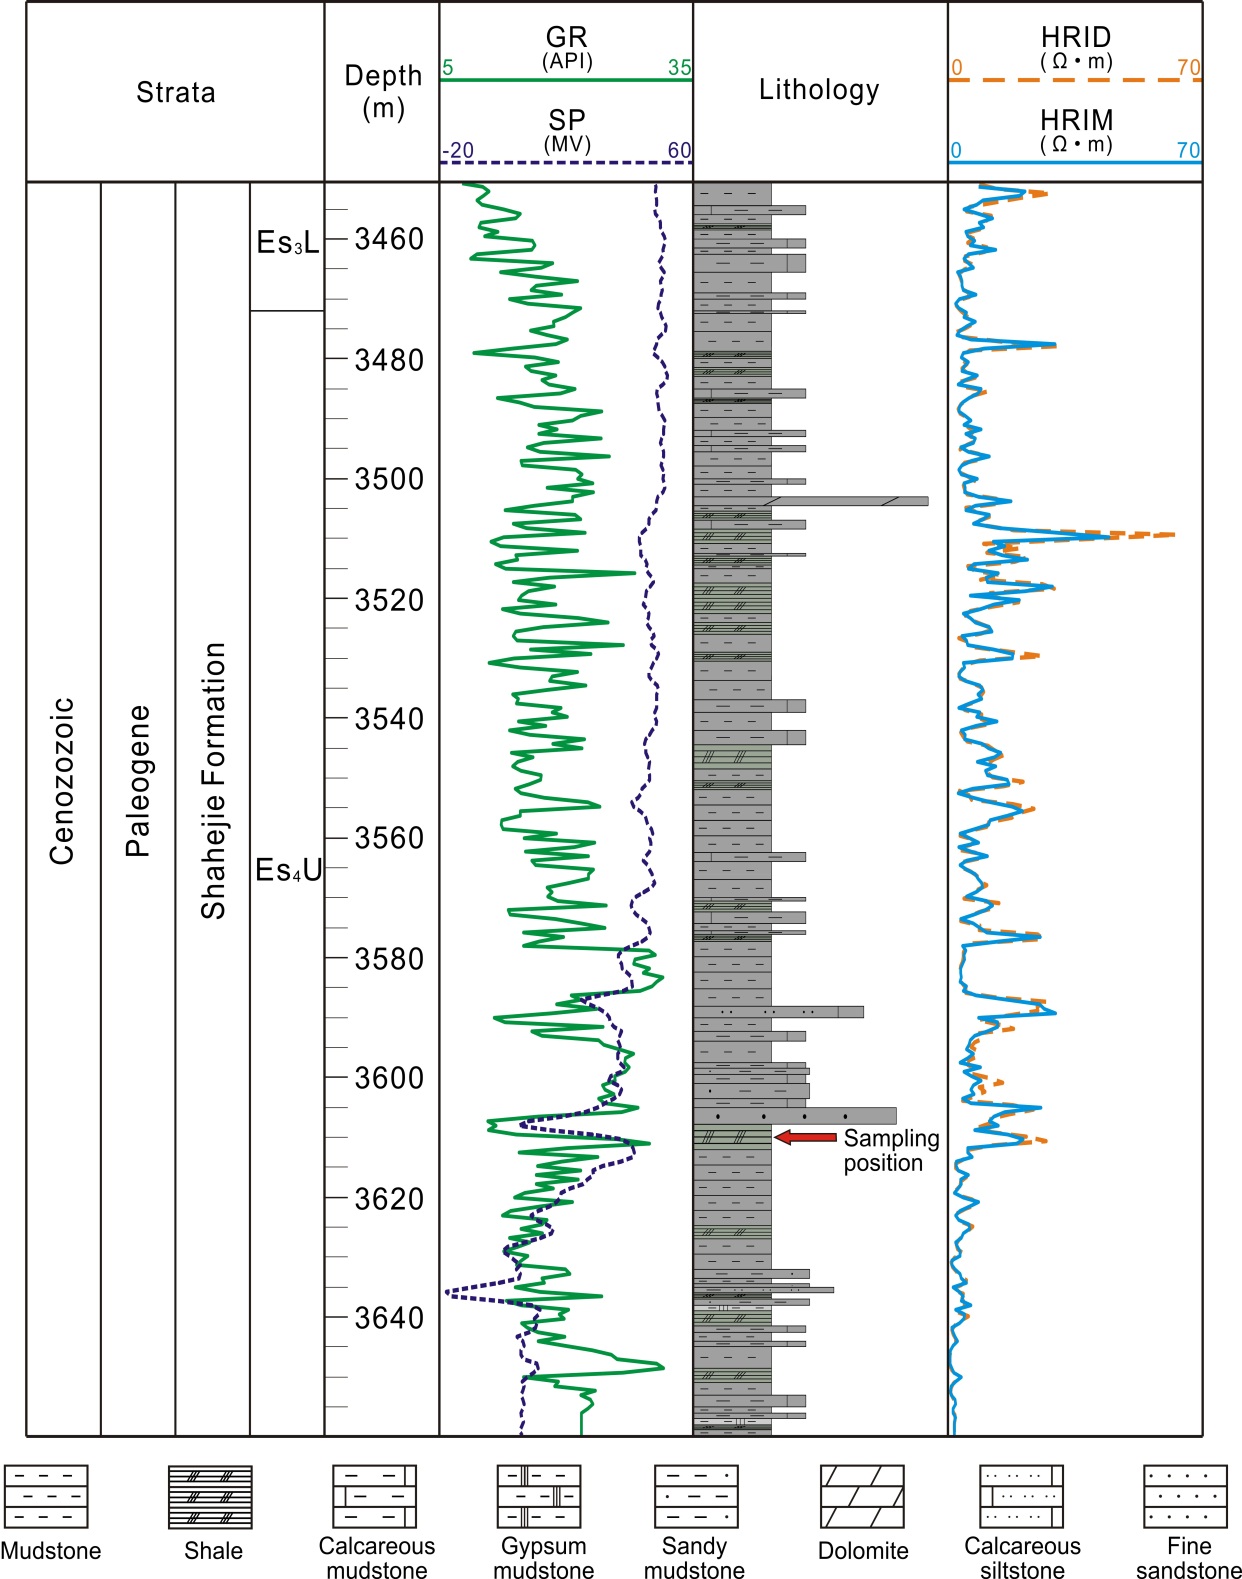


Figure S1: An example of integrated column chart from the sampling well W584. Es3L: the lower part of the Sha-3 Member of the Shahejie Formation; Es4U: the upper part of the Sha-4 Member of the Shahejie Formation; GR = natural gamma ray; SP = spontaneous potential; HRID = high resolution processed deep induction log; HRIM = high resolution processed medium induction log. The data were from the database of SinoPec ShengLi Oilfield Company. Red arrow indicates the sampling position of sample DYS15 at 3608.6 m (burial depth = 3598.0 m).


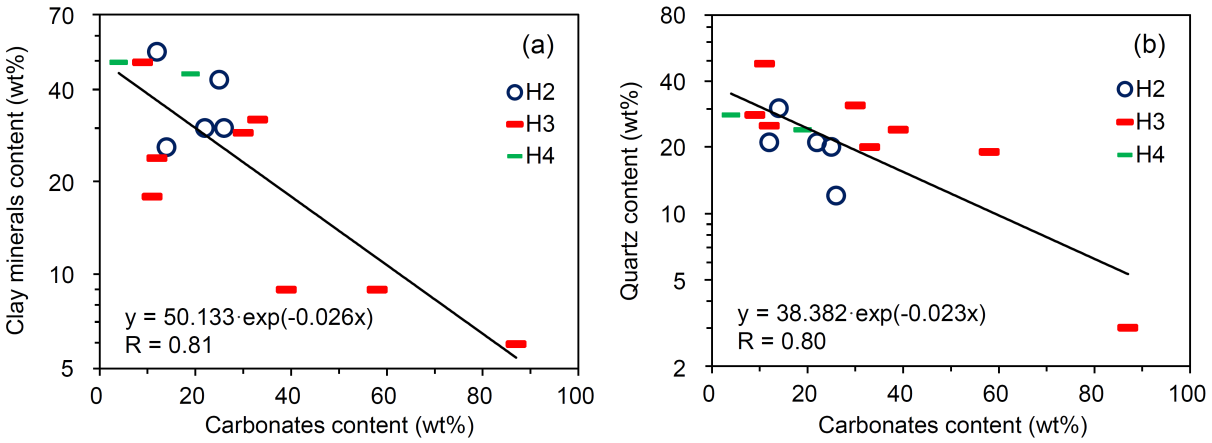


Figure S2: Correlation relationships of carbonates content with clay minerals and quartz contents for the Soxhlet-extracted samples from the Es4U shale. The samples with the hysteresis loops of types H2, H3 and H4 mainly contain inkbottle-, slit- and narrow slit-shaped pores respectively. The data are listed in Table S1.


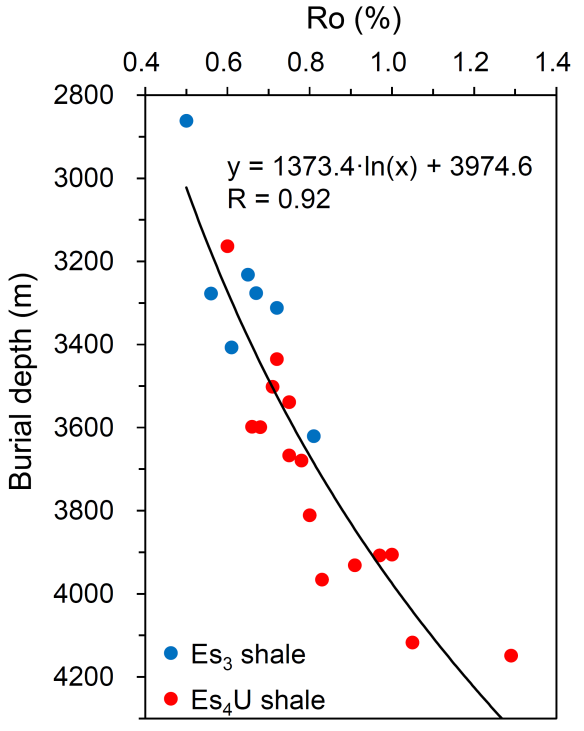


Figure S3: Correlation relationship between burial depth and tested Ro for the Dongying shale samples. The regression equation was used to calculate the Ro of sample DYS13. Red dots represent the tested samples (Es4U shale) in this study. The data are listed in Table S1. Blue dots represent the data of the shale samples from the Sha-3 Member shale (Es3 shale), collected from the database of SinoPec ShengLi Oilfield Company.


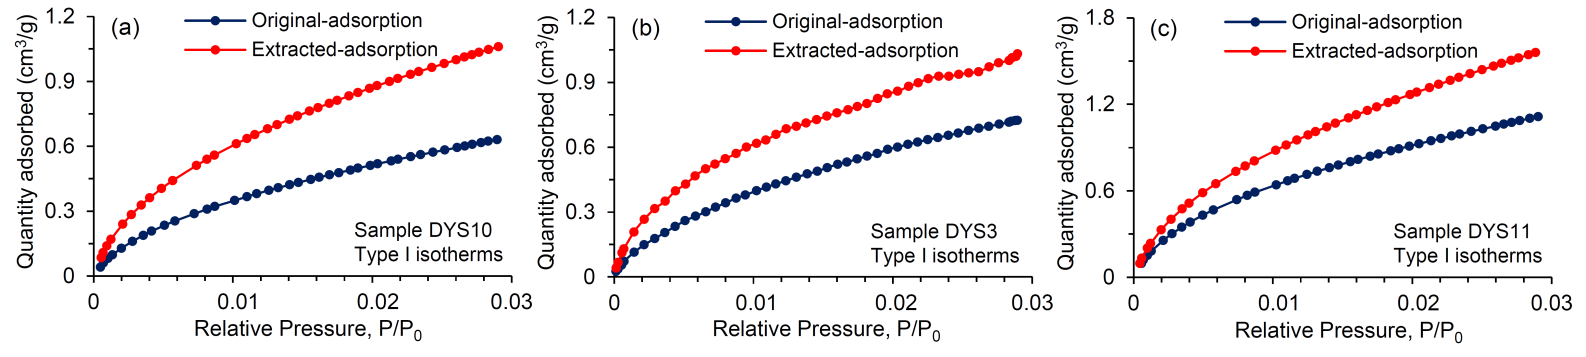


Figure S4: CO2 isotherms of the original and Soxhlet-extracted samples from the Dongying Es4U shale. (a) sample DYS10, (b) sample DYS3 and (c) sample DYS11.


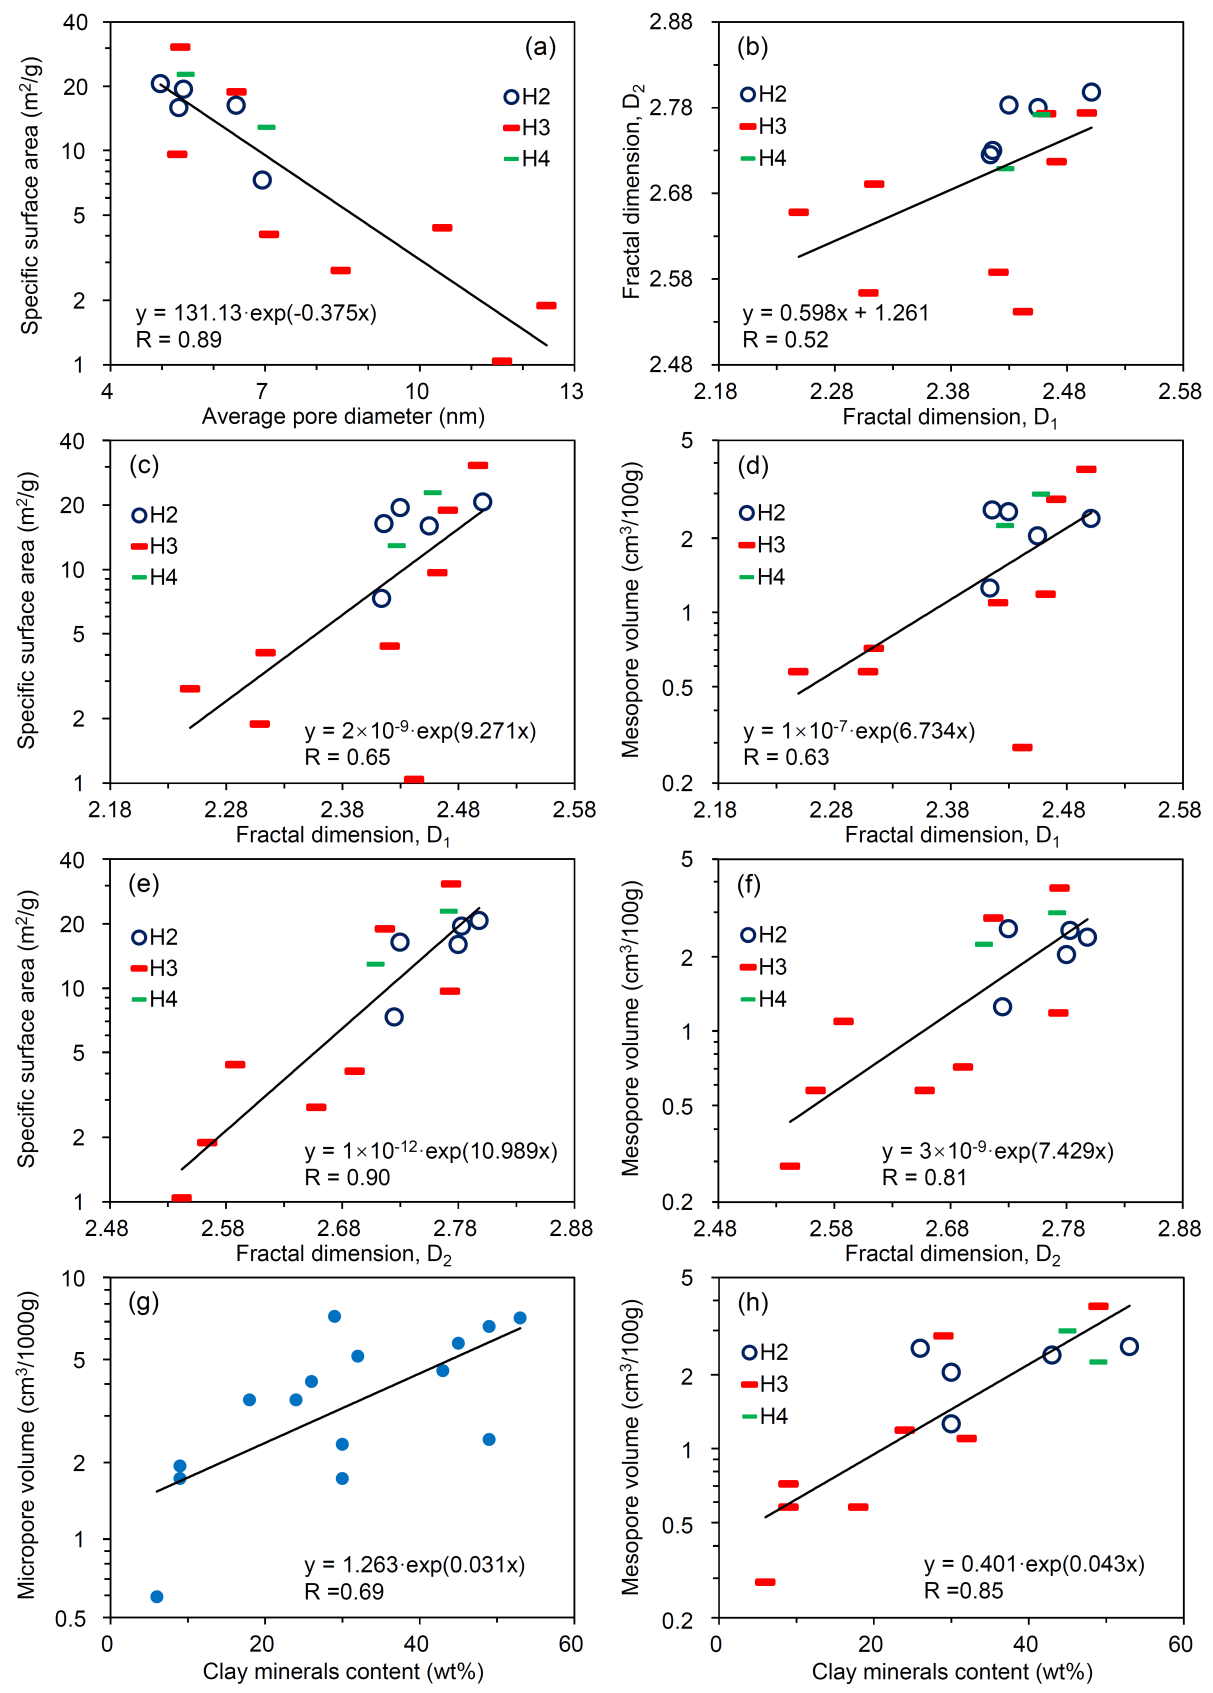


(continued on next page)

Figure S5: Correlation relationships between pore parameters and of pore parameters with geological variables for the Soxhlet-extracted samples from the Es4U shale with different types of hysteresis loops. (a)–(f) between specific surface area, mesopore volume, average pore diameter, fractal dimensions D1 and D2; (g)–(l) correlation relationships of pore parameters (mesopore volume, micropore volume, average pore diameter and fractal dimensions D1) with clay minerals, carbonates and dolomite contents, burial depth and Ro; (m) between micro-mesopore volume and specific surface area. The samples with the hysteresis loops of types H2, H3 and H4 mainly contain inkbottle-, slit- and narrow slit-shaped pores respectively. The data are listed in Tables S1 and S2.


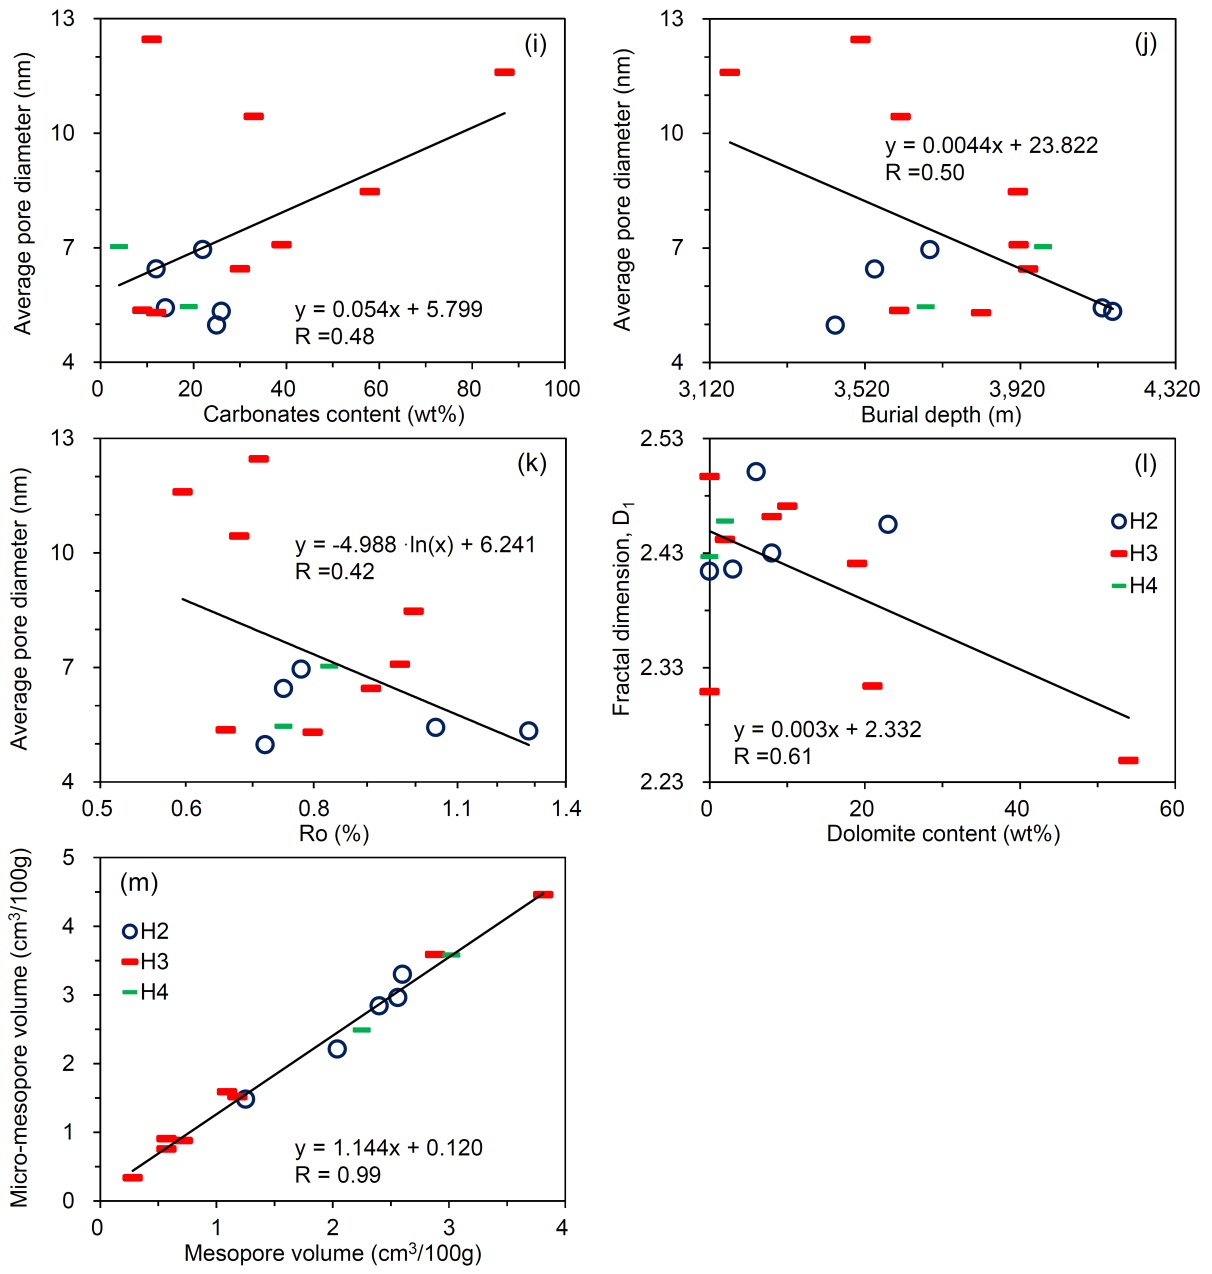


Figure S5 (Continued).


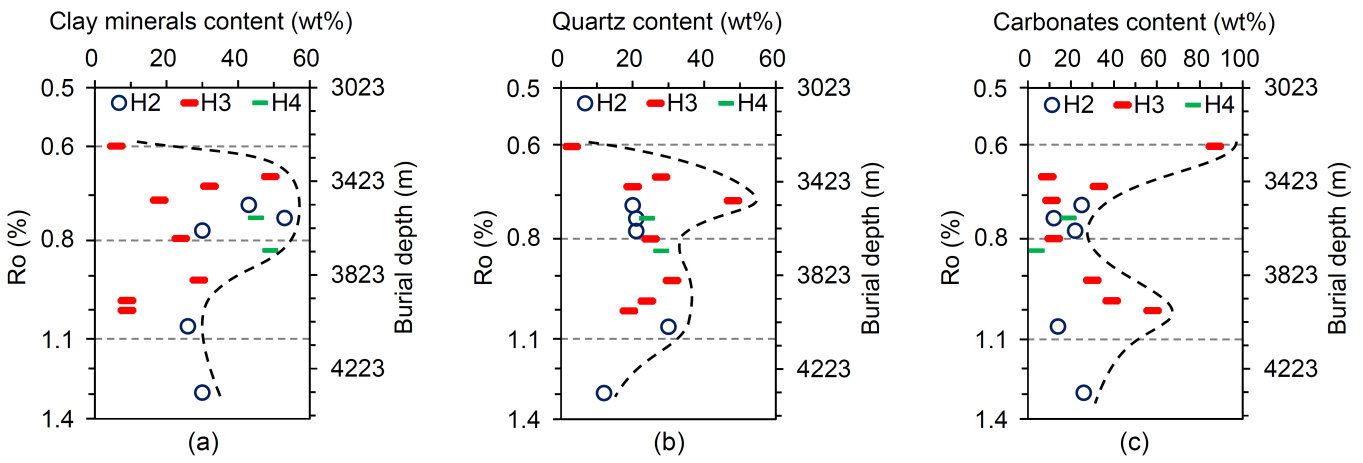


Figure S6: Cross plots of major minerals with Ro and burial depth for the Soxhlet-extracted samples from the Es4U shale. The samples with the hysteresis loops of types H2, H3 and H4 mainly contain inkbottle-, slit- and narrow slit-shaped pores respectively. The data are listed in Table S1.
